# Supplementary material for: The Correlation between Gut Microbiota and Serum Metabolomic in Elderly Patients with Chronic Heart Failure
Source: Hindawi journal article supplement (doi:10.1155/2021/5587428), 2021-01-01
Supplement: f1 [file 5587428.f1.zip]

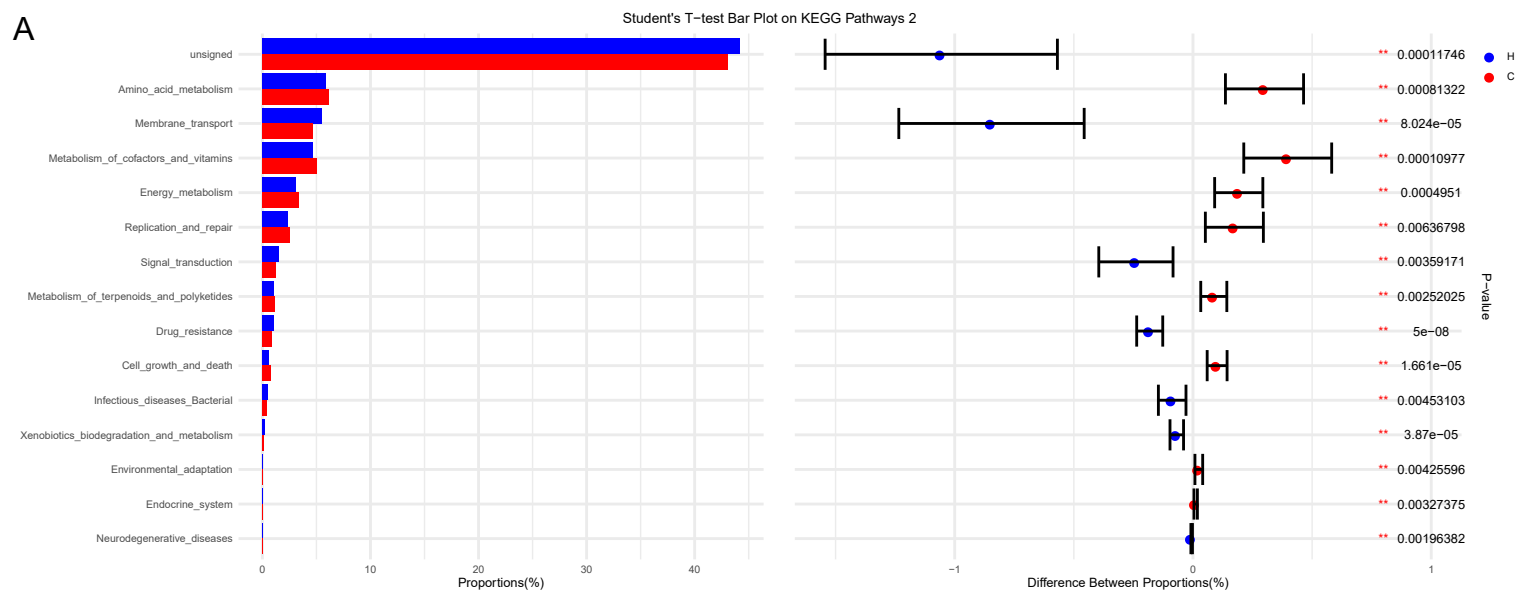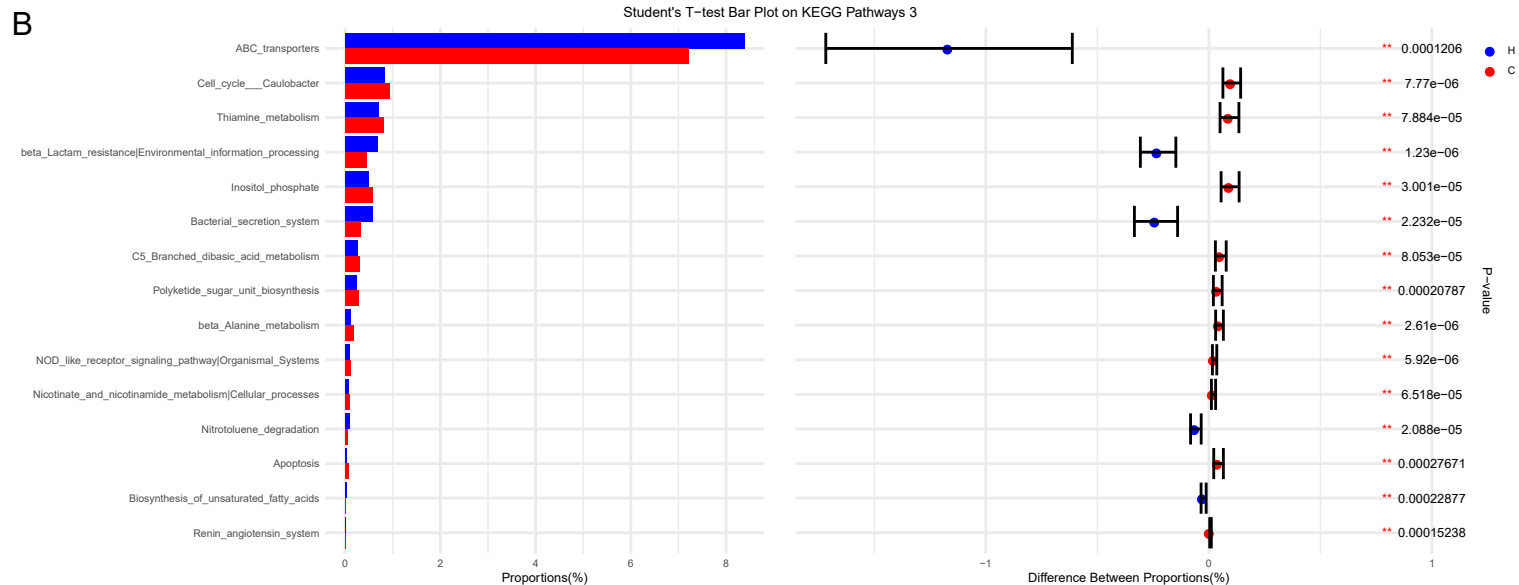

Supplementary Figure 2. The different pathway at L2 and L3 level in Healthy and CHF group. (A). The enriched pathway at L2 level. (B). The enriched pathway at L3 level. C: Healthy group, H: CHF group.
