# Supplementary material for: The Correlation between Gut Microbiota and Serum Metabolomic in Elderly Patients with Chronic Heart Failure
Source: Hindawi journal article supplement (doi:10.1155/2021/5587428), 2021-01-01
Supplement: f1 [file 5587428.f1.zip]

[illegible]

Supplementary Figure 1. The relative abundance of gut microbiota at phylum and genus level. (A). Relative abundance of microbiota in samples at phylum level. (B). Heatmap showed relative abundance of microbiota in samples at the genus level. C: Healthy group, H: CHF group.
